# Supplementary material for: Synthesis and spectroscopic properties of modular platinum(II) terpyridine phosphorescent pockets
Source: Royal Society of Chemistry journal article supplement (doi:10.1039/b900030e), 2009-01-01
Supplement: b900030e.pdf [file b900030e.pdf]

**Electronic Supplementary Information: B900030E**

**Synthesis and Spectroscopic Properties of Modular Platinum(II) Terpyridine  
Phosphorescent Pockets**

Wah-Leung Tong,<sup>a</sup> Michael C. W. Chan,<sup>\*a</sup> Nianyong Zhu<sup>b</sup> and Sze-Kar Leung<sup>a</sup>

<sup>a</sup> *Department of Biology and Chemistry and Centre for Marine Environmental Research and Innovative Technology, City University of Hong Kong, Tat Chee Avenue, Kowloon, Hong Kong, China.*

<sup>b</sup> *Department of Chemistry, The University of Hong Kong, Pokfulam Road, Hong Kong, China.*

Experimental details and characterization data for functionalized terpyridine ligands and **1–4**; 77 K glass and solid-state emission data for **1–4**; absorption and solution emission spectra of **1** and **2** in CH<sub>2</sub>Cl<sub>2</sub> and CH<sub>3</sub>CN at 298 K.

## Experimental Section

### Synthetic Procedures

CAUTION: Perchlorate salts of metal-organic complexes are potentially explosive and should be handled with care and in small amounts. Compound **5** was purchased from Carbocore Inc. (USA). Published procedures or minor modifications thereof were used for the preparation of the following compounds (Scheme S1): **6** and **7**,<sup>1</sup> **8**,<sup>2</sup> (Scheme S2): **11**,<sup>3</sup> (Scheme S3): **14**.<sup>4</sup>

Scheme S1

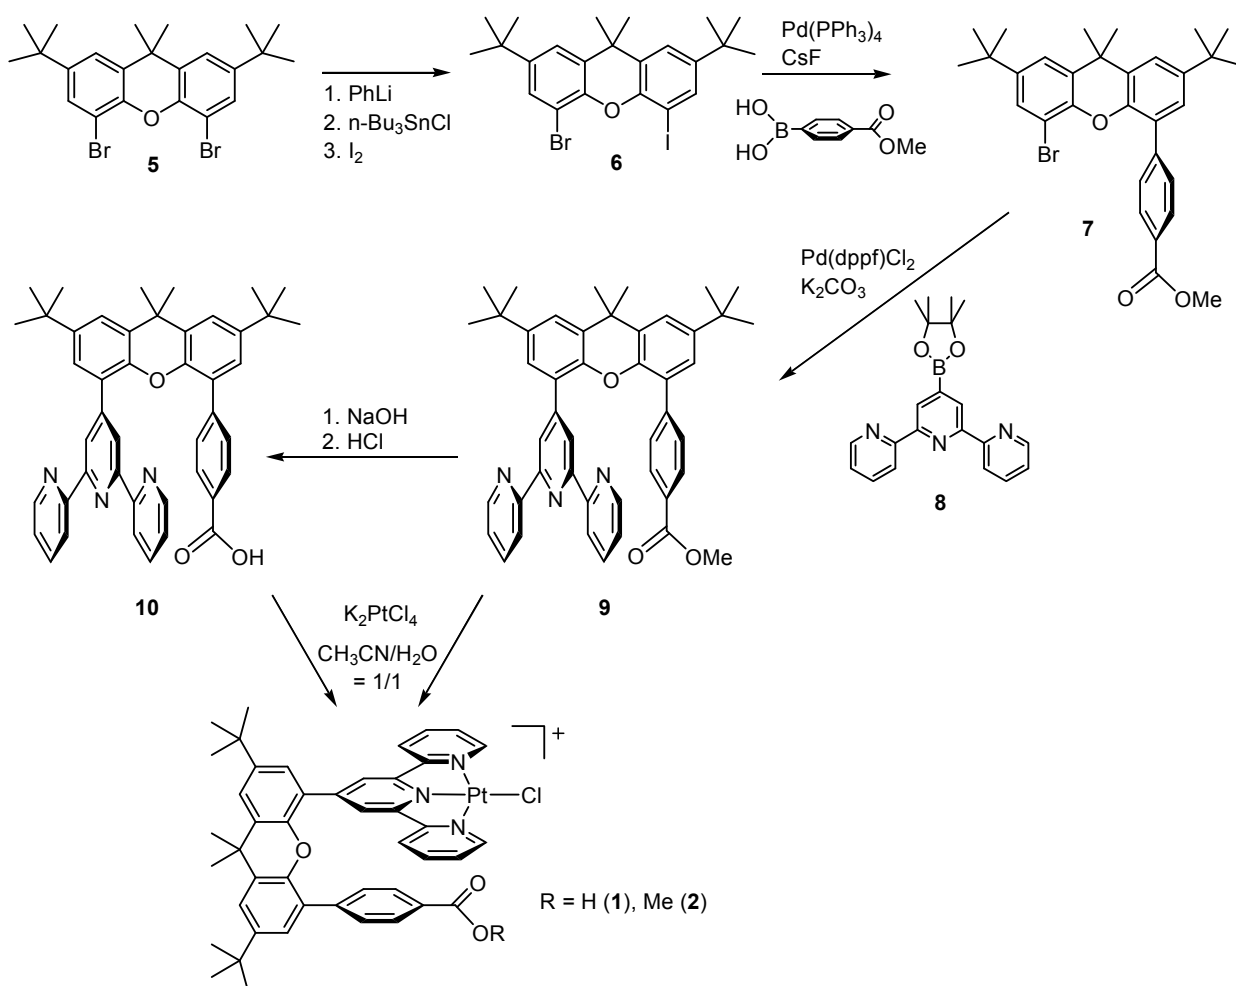

**9**: To a two-necked flask were added **7** (0.10 g, 0.186 mmol), **8** (0.094 g, 0.260 mmol),  $\text{Pd}(\text{dppf})\text{Cl}_2$  ( $\text{CH}_2\text{Cl}_2$  adduct, 0.017 g, 0.0186 mmol) and  $\text{K}_2\text{CO}_3$  (0.13 g, 0.928 mmol). The flask

was fitted with a septum, evacuated, and refilled with N<sub>2</sub>. A degassed mixture of 1,4-dioxane/DI water (10:1; 5 mL) was added via syringe, and the sealed reaction mixture was stirred at 100 °C for 40 h. The resultant black suspension was diluted with CH<sub>2</sub>Cl<sub>2</sub> and filtered with copious washing of CH<sub>2</sub>Cl<sub>2</sub>. The black filtrate was concentrated *in vacuo* and purified by alumina column chromatography (10 % ethyl acetate in hexane) to afford **9** as a white crystalline solid (0.11 g, 85%). <sup>1</sup>H NMR (300 MHz, CD<sub>2</sub>Cl<sub>2</sub>): δ 8.63 (d, *J* = 7.9 Hz, 2H), 8.58 (d, *J* = 4.0 Hz, 2H), 8.37 (s, 2H), 7.90-7.85 (m, 2H), 7.55 (d, *J* = 2.3 Hz, 1H), 7.50 (d, *J* = 2.4 Hz, 1H), 7.35 (d, *J* = 2.2 Hz, 1H), 7.33-7.31 (m, 2H), 7.24 (d, *J* = 8.5 Hz, 2H), 7.17 (d, *J* = 8.5 Hz, 2H), 7.14 (d, *J* = 2.4 Hz, 1H), 3.85 (s, 3H), 1.77 (s, 6H), 1.40 (s, 9H), 1.34 (s, 9H). ES-MS (+ve mode): *m/z* 689 [M + H]<sup>+</sup>.

**10**: A mixture of **9** (0.050 g, 0.0734 mmol) and 3.0 M NaOH (0.35 mL, 1.03 mmol) in THF (1 mL) in a round bottom flask was sealed then stirred at 100 °C for 3 hr. The resultant colourless solution was diluted with a mixture of diethyl ether and THF, and the reaction mixture was acidified by 2N HCl. The organic layer was separated and then washed with brine, and dried over MgSO<sub>4</sub>. The solvent was evaporated *in vacuo*, and the resultant purple paste was re-dissolved in CH<sub>3</sub>CN and filtered to afford **10** as a pale yellow powder (0.030 g, 60%). <sup>1</sup>H NMR (300 MHz, CDCl<sub>3</sub>): δ 8.66 (d, *J* = 5.0 Hz, 2H), 8.65 (d, *J* = 6.6 Hz, 2H), 8.34 (s, 2H), 7.87-7.81 (m, 2H), 7.51 (d, *J* = 2.2 Hz, 1H), 7.49 (d, *J* = 2.5 Hz, 1H), 7.42 (d, *J* = 8.5 Hz, 2H), 7.35 (d, *J* = 2.5 Hz, 1H), 7.33-7.29 (m, 2H), 7.24 (d, *J* = 8.5 Hz, 2H), 7.15 (d, *J* = 2.2 Hz, 2H), 1.78 (s, 6H), 1.38 (s, 9H), 1.36 (s, 9H). ES-MS (+ve mode): *m/z* 675 [M + H]<sup>+</sup>.

**1**[ClO<sub>4</sub>] and **2**[ClO<sub>4</sub>]: see main paper. **2**[Cl] was obtained before the anion metathesis procedure. **2**[PF<sub>6</sub>] was afforded by anion metathesis using KPF<sub>6</sub> in CH<sub>3</sub>CN. Like **2**[ClO<sub>4</sub>], **2**[Cl] and **2**[PF<sub>6</sub>] were recrystallized by vapour diffusion of diethyl ether into a CH<sub>2</sub>Cl<sub>2</sub>/CH<sub>3</sub>CN solution to give analytically pure yellow to yellow-orange crystalline solids.

Scheme S2

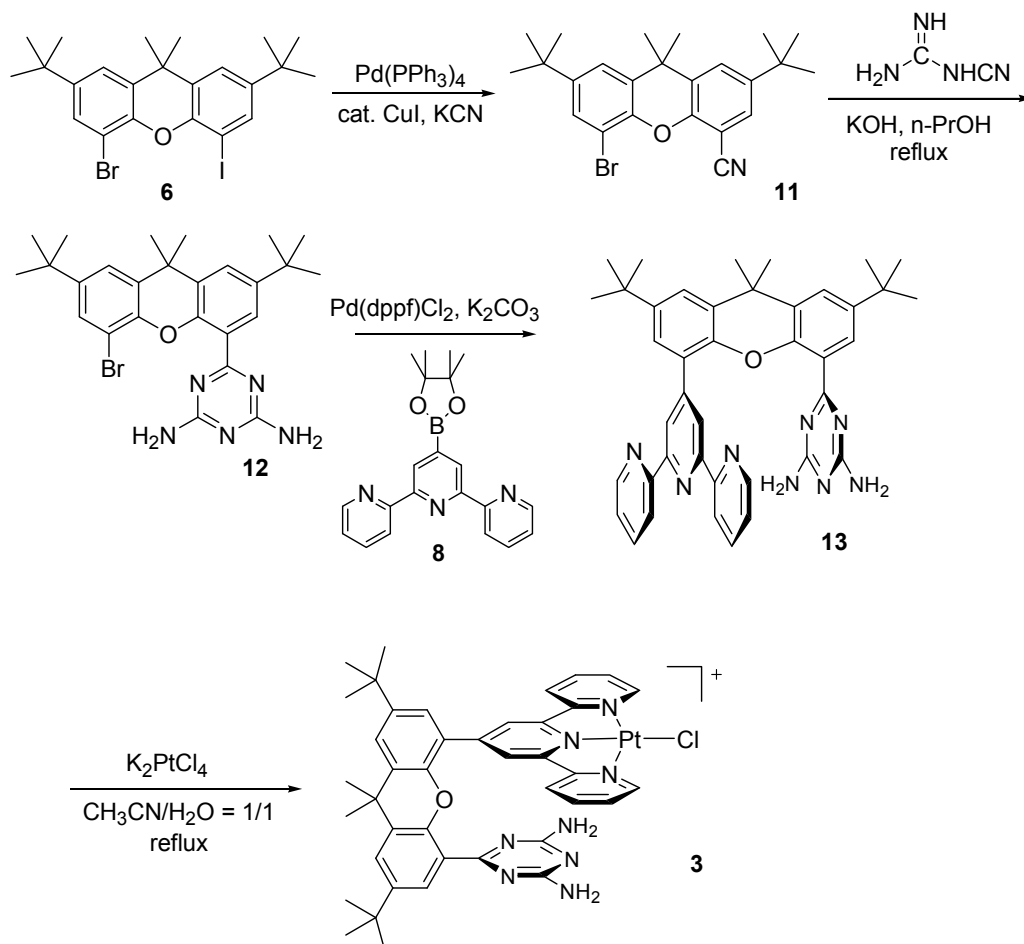

**12**: To a mixture of **11** (0.237 g, 0.559 mmol), powdered KOH (0.038 g, 0.670 mmol) and dicyandiamide (0.235 g, 2.798 mmol) was added 20 mL of 1-propanol. The reaction mixture was stirred at reflux overnight, then poured into  $\text{CH}_2\text{Cl}_2$ . The organic layer was washed with water and brine, dried over  $\text{MgSO}_4$  and then concentrated *in vacuo*. The crude product was purified by silica gel column chromatography (chloroform to 10% methanol in chloroform) to afford **12** as white solids (0.182 g, 64%).  $^1\text{H NMR}$  ( $\text{CDCl}_3$ , 300 MHz)  $\delta$  7.51 (d,  $J = 2.2$  Hz, 1H), 7.48 (d,  $J = 2.5$  Hz, 1H), 7.40 (d,  $J = 2.2$  Hz, 1H), 7.31 (d,  $J = 2.2$  Hz, 1H), 5.31 (br, s, 4H), 1.64 (s, 6H), 1.34 (s, 9H), 1.30 (s, 9H). ES-MS (+ve mode):  $m/z$  510  $[\text{M} + \text{H}]^+$ .

**13**: Under an inert atmosphere, **12** (0.142 g, 0.278 mmol), **8** (0.100 g, 0.279 mmol), K<sub>2</sub>CO<sub>3</sub> (0.192 g, 1.391 mmol) and Pd(dppf)Cl<sub>2</sub> (0.023 g, 0.028 mmol) in dioxane/water (10:1, 10 mL) were added to a reaction flask. The reaction mixture was heated to 100°C, then sealed and stirred at this temperature for 2 d. The crude product was diluted with CH<sub>2</sub>Cl<sub>2</sub> and filtered through celite. The filtrate was concentrated *in vacuo* and purified by alumina column chromatography (CHCl<sub>3</sub> to 2% MeOH in CHCl<sub>3</sub>) to afford **13** as white solid (0.137 g, 75%). <sup>1</sup>H NMR (CDCl<sub>3</sub>, 300 MHz) δ 8.61-8.58 (m, 4H), 8.49 (s, 2H), 7.41 (dd, *J* = 7.7, 7.7 Hz, 2H), 7.50 (d, *J* = 2.2 Hz, 1H), 7.46 (d, *J* = 2.2 Hz, 1H), 7.30 (d, *J* = 2.2 Hz, 1H), 7.27 (d, *J* = 2.2 Hz, 1H), 7.16-7.12 (m, 2H), 5.29 (br, s, 4H), 1.76 (s, 6H), 1.36 (s, 9H), 1.34 (s, 9H). ES-MS (+ve mode): *m/z* 663 [M + H]<sup>+</sup>.

**3**[ClO<sub>4</sub>]: see main paper.

### Scheme S3

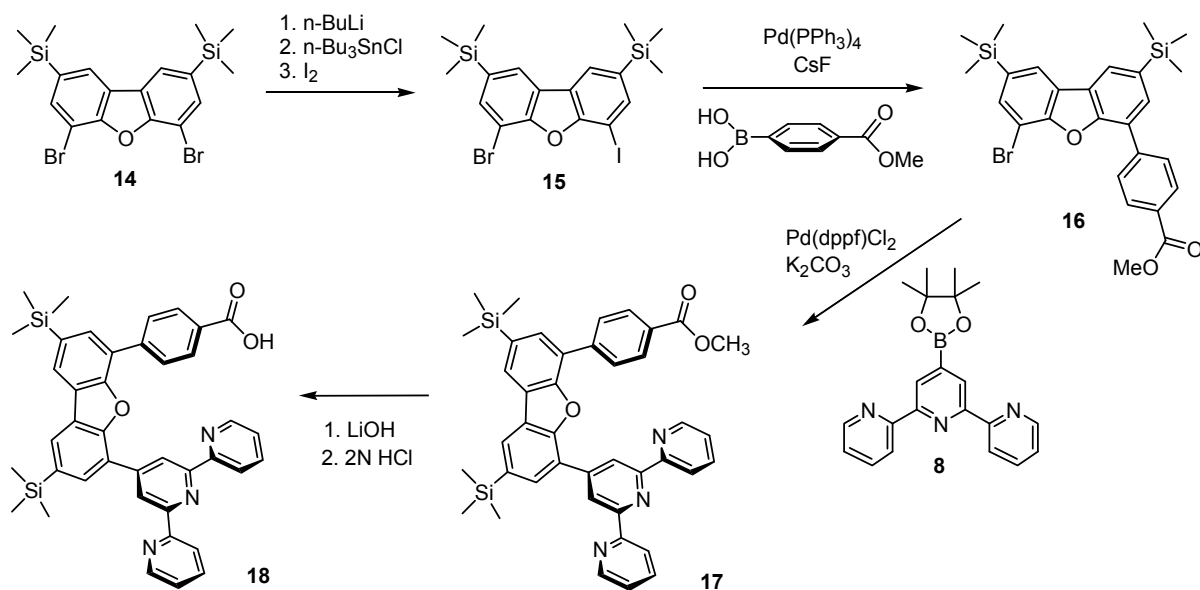

Compounds **15–18** were prepared by modifying the synthetic procedures for **6**, **7**, **9** and **10** respectively.<sup>2</sup>

**15**: 53 % yield. <sup>1</sup>H NMR (300 MHz, CDCl<sub>3</sub>): δ 8.03 (d, *J* = 0.8 Hz, 1H), 8.00 (d, *J* = 0.8 Hz, 1H), 7.94 (d, *J* = 0.8 Hz, 1H), 7.73 (d, *J* = 0.8 Hz, 1H), 0.36 (s, 9H), 0.37 (s, 9H).

**16**: 49 % yield. <sup>1</sup>H NMR (300 MHz, CDCl<sub>3</sub>): δ 8.23 (d, *J* = 8.3 Hz, 2H), 8.13 (d, *J* = 1.2 Hz, 1H), 8.07 (s, 1H), 8.05 (d, *J* = 8.3 Hz, 2H), 7.79 (d, *J* = 1.2 Hz, 1H), 7.73 (s, 1H), 3.99 (s, 3H), 0.41 (s, 9H), 0.38 (s, 9H).

**17**: 83 % yield. <sup>1</sup>H NMR (300 MHz, CDCl<sub>3</sub>): δ 9.08 (s, 2H), 8.75 (d, *J* = 4.8 Hz, 2H), 8.71 (d, *J* = 7.9 Hz, 2H), 8.26 (s, 1H), 8.21 (s, 1H), 8.12 (d, *J* = 8.3 Hz, 2H), 8.04 (s, 1H), 7.93 (t, *J* = 7.5 Hz, 2H), 7.87 (d, *J* = 8.3 Hz, 2H), 7.83 (s, 1H), 7.41 (t, *J* = 6.1 Hz, 2H), 3.89 (s, 3H), 0.46 (s, 9H), 0.43 (s, 9H).

**18**: 95 % yield.  $^1\text{H}$  NMR (300 MHz,  $\text{CDCl}_3$ ):  $\delta$  9.09 (s, 2H), 8.77 (d,  $J = 4.1$  Hz, 2H), 8.70 (d,  $J = 7.9$  Hz, 2H), 8.26 (d,  $J = 0.9$  Hz, 1H), 8.23 (d,  $J = 0.9$  Hz, 1H), 8.15 (d,  $J = 8.5$  Hz, 2H), 8.05 (d,  $J = 1.2$  Hz, 1H), 7.95 (d,  $J = 8.5$  Hz, 2H), 7.95-7.90 (m, 2H), 7.84 (d,  $J = 1.2$ , 1H), 7.43-7.39 (m, 2H), 0.45 (s, 9H), 0.44 (s, 9H). ES-MS (+ve mode):  $m/z$  664  $[\text{M} + \text{H}]^+$ .

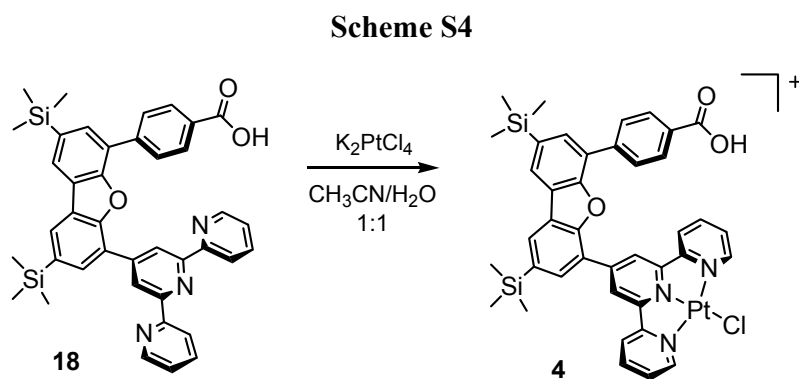

$4[\text{ClO}_4]$ : see main paper.

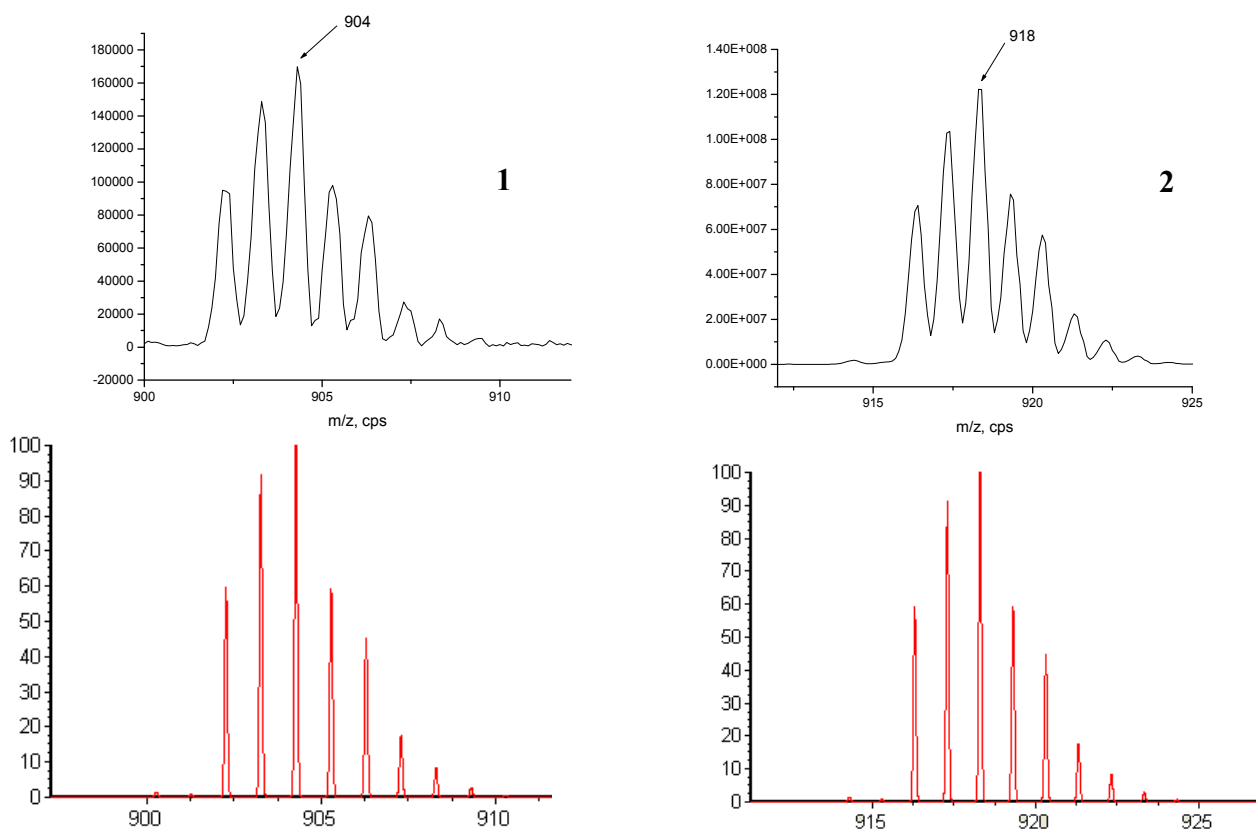

**Fig. S1.** ESI mass spectra of  $[M^+]$  in  $CH_2Cl_2$  (upper) and isotopic distribution simulation (lower) for **1** $[ClO_4]$  (left) and **2** $[ClO_4]$  (right).



**Table S1.** 77 K glass ( $10^{-5}$  M unless specified) and solid-state emission data

| Fluid                | $\lambda_{\text{ex}}/\text{nm}$ | 77K: $\lambda_{\text{max}}/\text{nm}$ ; $\tau/\mu\text{s}$                                      |  |
|----------------------|---------------------------------|-------------------------------------------------------------------------------------------------|--|
| 1[ClO <sub>4</sub> ] | 419                             | 520 <sup>a</sup> (max; $\tau = 32$ ), 554, 598                                                  |  |
| 2[ClO <sub>4</sub> ] | 425                             | 520 <sup>b</sup> (max; $\tau = 35$ ), 555, 610 <sup>c</sup> ( $\tau_1 = 3.4$ ; $\tau_2 = 41$ )  |  |
| 3[ClO <sub>4</sub> ] | 410                             | 519 <sup>b</sup> (max; $\tau = 29$ ), 556, 597                                                  |  |
| 4[ClO <sub>4</sub> ] | 406                             | 542 <sup>d</sup> (max; $\tau = 11$ ), 584, 654 <sup>c</sup> ( $\tau_1 = 2.1$ ; $\tau_2 = 9.5$ ) |  |

  

| Solid state          |     | 298 K: $\lambda_{\text{max}}/\text{nm}$ ; $\tau/\mu\text{s}$ | 77K: $\lambda_{\text{max}}/\text{nm}$ ; $\tau/\mu\text{s}$ |
|----------------------|-----|--------------------------------------------------------------|------------------------------------------------------------|
| 1[ClO <sub>4</sub> ] | 419 | 518 (max), 548; 1.6                                          | 519 (max), 556, 593; 14                                    |
| 2[Cl]                | 425 | 552; 1.4                                                     | 549; 28                                                    |
| 2[ClO <sub>4</sub> ] | 425 | 585; 0.8                                                     | 555 (max), 583; 34                                         |
| 2[PF <sub>6</sub> ]  | 420 | 597; 1.1                                                     | 574; 36                                                    |
| 3[ClO <sub>4</sub> ] | 430 | 583; 0.2                                                     | 547, 601 (max); 15                                         |
| 4[ClO <sub>4</sub> ] | 406 | 595; 0.5                                                     | 537, 624 (max); 11                                         |

<sup>a</sup> In MeOH:EtOH (1:4). <sup>b</sup> In butyronitrile. <sup>c</sup> Excimeric emission observed at  $10^{-3}$  M.

<sup>d</sup> In DMSO.

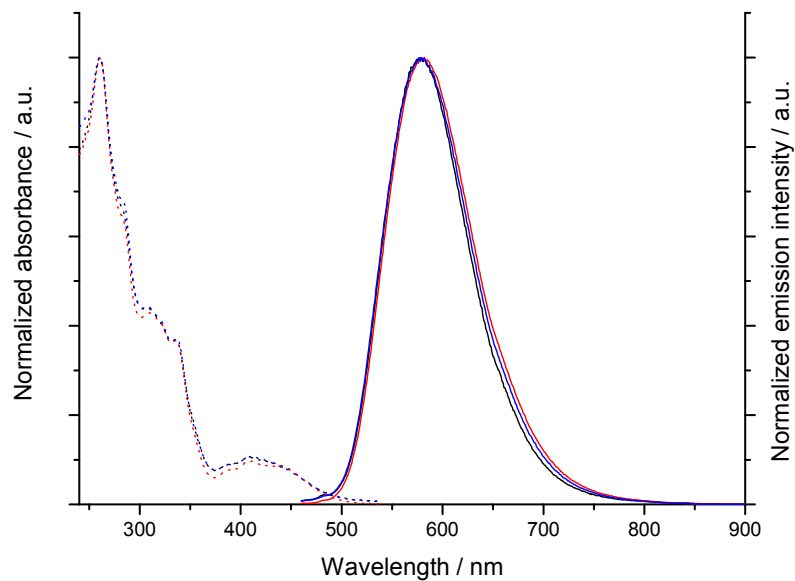

**Fig. S2.** Absorption (dots) and solution emission (line;  $\lambda_{\text{ex}}$  410 nm) spectra of  $\text{Cl}^-$  (black),  $\text{ClO}_4^-$  (red) and  $\text{PF}_6^-$  (blue) salts of **2** in  $\text{CH}_2\text{Cl}_2$  ( $10^{-5}$  M) at 298 K.

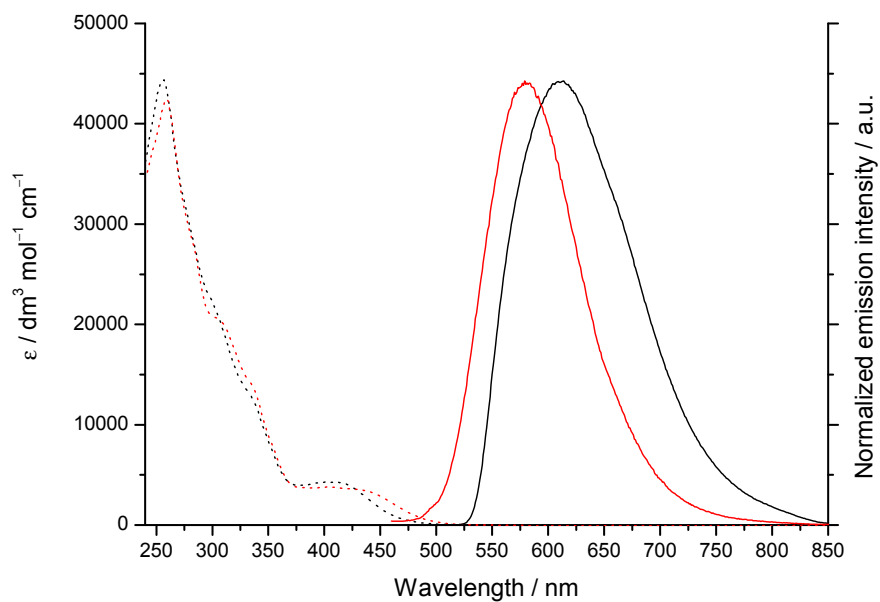

**Fig. S3.** Absorption (dots) and solution emission (line;  $\lambda_{\text{ex}}$  410 nm) spectra of **1** in  $\text{CH}_2\text{Cl}_2$  (red) and  $\text{CH}_3\text{CN}$  (black) ( $10^{-5}$  M) at 298 K.

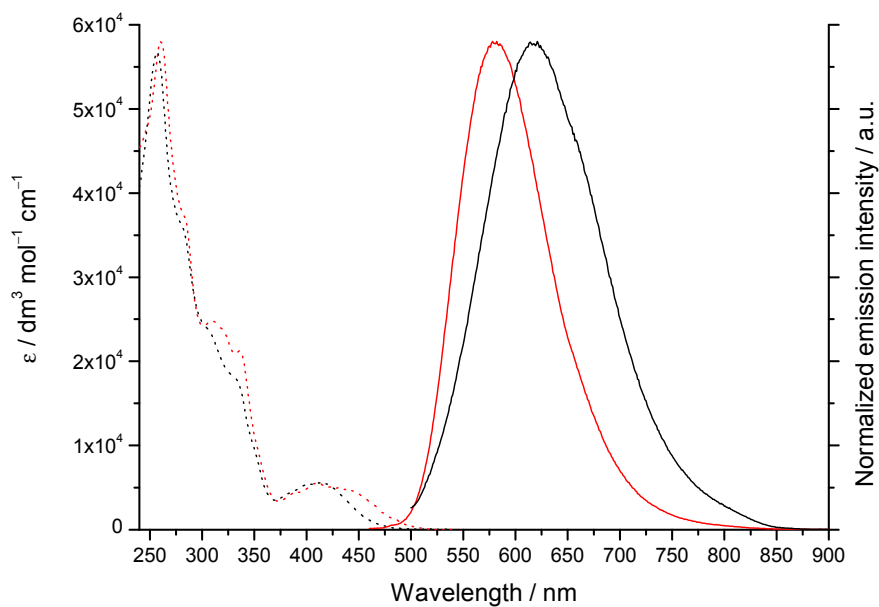

**Fig. S4.** Absorption (dots) and solution emission (line;  $\lambda_{\text{ex}}$  410 nm) spectra of **2** in  $\text{CH}_2\text{Cl}_2$  (red) and  $\text{CH}_3\text{CN}$  (black) ( $10^{-5}$  M) at 298 K.

## References in ESI

---

- 1 S-Y. Liu and D. G. Nocera, *J. Am. Chem. Soc.*, 2005, **127**, 5278.
- 2 C. J. Aspley and J. A. G. Williams, *New J. Chem.*, 2001, **25**, 1136.
- 3 B. A. Anderson, E. C. Bell, F. O. Ginah, N. K. Harn, L. M. Pagh and J. P. Wepsiec, *J. Org. Chem.*, 1998, **63**, 8224.
- 4 E. B. Schwartz, C. B. Knobler and D. J. Cram, *J. Am. Chem. Soc.*, 1992, **114**, 10775.
